# Supplementary material for: Cell-free Mitochondrial DNA as a Potential Biomarker for Hypoxic Stress
Source: Research Square preprint supplement (doi:10.21203/rs.3.rs-7266256/v1), 2025-08-06
Supplement: Supplementary file 1 [file 80a7410d8bcaf456b930602c.docx]

Supplementary Material

**Cell-free Mitochondrial DNA as a Potential Biomarker for Hypoxic Stress**

Qiaoping Qu1, 2, Can Xiao 2, Xuemei Liu 2, Aixue Huang 2, Hui Li 2, Xu Gang 1, Ningsheng Shao 2, Yuechao Zhao 2, *, Bo Gao 1, 2, *

1 School of Basic Medical Sciences, Anhui Medical University, Anhui 230032, China

2 Beijing Institute of Basic Medical Sciences, Beijing 100850, China.

* Correspondence and requests for materials should be addressed to Prof. Y. Z. and B. G.

Beijing Institute of Basic Medical Sciences, 27 Taiping Road, Beijing 100850, China.

Tel: +8615652240128, +8613021060196

Fax: +861068213039

E-mail: [zhaoyuechao@bmi.ac.cn](mailto:zhaoyuechao@bmi.ac.cn); [gaobo1@bmi.ac.cn](mailto:gaobo1@bmi.ac.cn)

**This PDF file includes:**

Supplementary Fig. S1

**Fig. S1.**


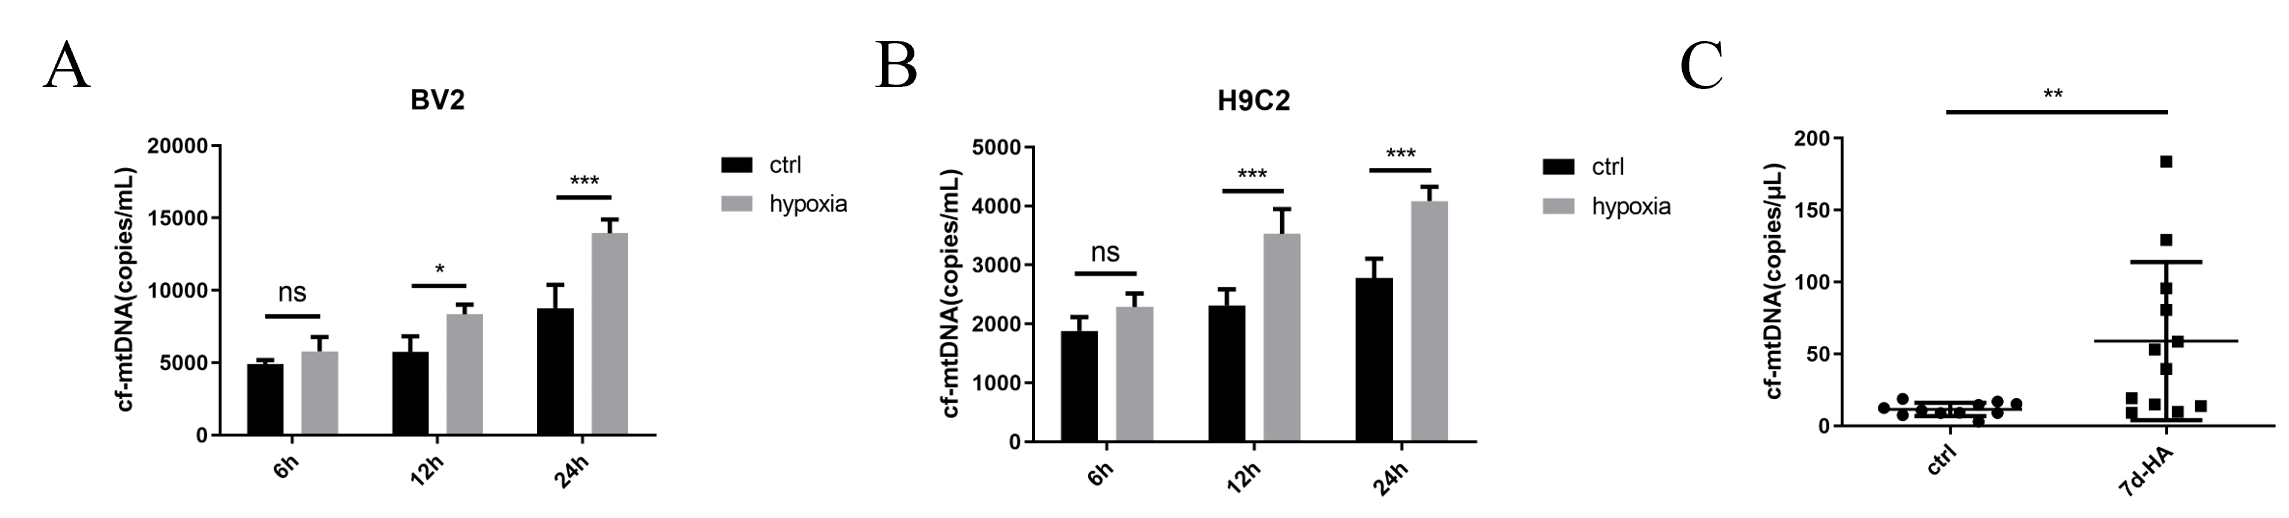


**A-B.** The alterations in cf-mtDNA copy numbers in the supernatants of BV2 cells **(A)** and H9C2 cells **(B)** after exosome precipitation. n=3. **C.** The alterations in cf-mtDNA copy numbers in the supernatants of mice sera after exosome precipitation. n=3. All the data are presented as the means ± SDs. Statistical analysis in **(A-B)** were performed withtwo-way ANOVA followed by Sidak's multiple comparisons test, **(C)** with unpaired t test followed by Welch's correction. *P<0.05; **P<0.01; ***P<0.001; ****P<0.0001; ns, no significant.
